# Supplementary material for: Psychosocial Factors of Health Professionals’ Intention to Use a Decision Aid for Down Syndrome Screening: Cross-Sectional Quantitative Study
Source: PubMed Central journal article supplement (PMC5943629; doi:10.2196/jmir.9036), 2018-04-25
Supplement: jmir_v20i4e114_app2.pdf [file jmir_v20i4e114_app2.pdf]

## Multimedia Appendix 2

*Psychosocial Factors of Health Professionals' Intention to Use a Decision Aid for Down Syndrome Screening: Cross-Sectional Quantitative Study, A.Rahimi et al.*

### Appendix 2

| Select Question(Link) | Select Question(Link) | Select Question(Link) |
|-----------------------|-----------------------|-----------------------|
| Select Question(Link) | Question QGENDER      | Question Q2           |
| Question I            | Question QREGION      | Question Q3           |
| Question QGEN         | Question AGEYMD       | Question Q4           |
| Question FILTRE1      | Question QETHNIE      | Question Q5           |
| Question FILTRE2      | Question CEMAIL       | Question Q6A          |
| Question FILTRE3      | Question VID          | Question Q7           |
| Question FILTRE4      | Question FILTRE12     | Question Q7G          |
| Question FILTRE5      | Question INTRO        | Question Q8           |
| Question FILTRE6      | Question Q1           | Question Q9A          |
| Question FILTRE7      | Question Q2           | Question Q9E          |
| Question FILTRE8      |                       | Question Q10          |
| Question FILTRE9      |                       | Question Q11          |
| Question FILTRE11     |                       | Question Q12          |
| Question QGENDER      |                       | Question Q13          |
|                       |                       | Question Q14          |
|                       |                       | Question QD1MNTH      |
|                       |                       | Question QD4          |
|                       |                       | Question QD5          |
|                       |                       | Question QD9          |
|                       |                       | Question              |

**Survey language**

Préférez-vous répondre à ce questionnaire en anglais ou en français ?

Would you prefer to complete the survey in English or French?

English  
 Français

>>

**QGEN (ASK ALL)**



CHU de Québec  
Centre de recherche

UNIVERSITÉ LAVAL

This province-wide survey is conducted by a health services research team from Université Laval, Quebec City, Quebec. The quality of your answers is essential. Do you agree to answer the following survey questions truthfully and thoughtfully?

I agree  
 I disagree

>>

## Multimedia Appendix 2

*Psychosocial Factors of Health Professionals' Intention to Use a Decision Aid for Down Syndrome Screening: Cross-Sectional Quantitative Study, A.Rahimi et al.*

FILTRE1 (ASK ALL)

 

How old are you?

Under 18 years

18 to 44 years

45 to 70 years

Aged 70 or older

>>

FILTRE2 (FILTRE1!=0)

 

What is the highest level of education for which you have OBTAINED a diploma?  
If you are student, what level of education are you currently pursuing?

No secondary education

Secondary education

Vocational studies (DVS, ACS, etc.)

Collegial studies

University studies

None of the above

>>

## Multimedia Appendix 2

### *Psychosocial Factors of Health Professionals' Intention to Use a Decision Aid for Down Syndrome Screening: Cross-Sectional Quantitative Study, A.Rahimi et al.*

**FILTRE3 (FILTRE2=5)**



CHU de Québec Centre de recherche      UNIVERSITÉ LAVAL

What is your employment status?

---

I am currently on a leave of absence because I am on preventive withdrawal; on maternity, paternity or parental leave; on sick leave; on sabbatical; other reason for absence, please specify:

I have full-time employment, as a wage earner and/or a self-employed worker

I have part-time employment, as a wage earner and/or a self-employed worker

I am a student, with or without employment

I am retired

I am unemployed and I am not a student

None of the above

>>

**FILTRE4 (FILTRE3=2,3,4)**



CHU de Québec Centre de recherche      UNIVERSITÉ LAVAL

What field of study did you choose in order to obtain your current employment?  
If you are student, in which field are you studying?

---

Administration and management

Education

Engineering

Health sciences

Human sciences

Political science and law

None of the above

>>

## Multimedia Appendix 2

*Psychosocial Factors of Health Professionals' Intention to Use a Decision Aid for Down Syndrome Screening: Cross-Sectional Quantitative Study, A.Rahimi et al.*

**FILTRE5 (FILTRE4=4)**



CHU de Québec Centre de recherche  
UNIVERSITÉ LAVAL

Are you, or are you studying to become, one of the following:

---

- Dentist
- Nurse
- Physician
- Pharmacist
- Physiotherapist
- Midwife
- None of the above

>>

**FILTRE6 (FILTRE5=3)**



CHU de Québec Centre de recherche  
UNIVERSITÉ LAVAL

Are you, or are you studying to become, one of the following:

---

- Cardiologist
- Gastroenterologist
- Family doctor/family physician/general practitioner
- Obstetrician gynecologist
- Otorhinolaryngologist
- Pediatrician
- Psychiatrist
- None of the above

>>

## Multimedia Appendix 2

*Psychosocial Factors of Health Professionals' Intention to Use a Decision Aid for Down Syndrome Screening: Cross-Sectional Quantitative Study, A.Rahimi et al.*

**FILTRE7 (FILTRE6=3,4)**



CHU de Québec  
Centre de recherche

UNIVERSITÉ LAVAL

Please check whichever applies to you:

---

I am doing my pre-externship (classroom) in medicine  
 I am doing my externship (clinical training) in medicine  
 I am doing my internship (specialization) in medicine  
 I am a physician (I have obtained my license to practice)

>>

**FILTRE8 (FILTRE5=6)**



CHU de Québec  
Centre de recherche

UNIVERSITÉ LAVAL

Please check whichever applies to you:

---

I haven't started yet my internship (last clinical training)  
 I am doing my internship (last clinical training)  
 I am a midwife (I have obtained my license to practice)

>>

**FILTRE9 (FILTRE7=3,4 OR FILTRE8=2,3)**



CHU de Québec  
Centre de recherche

UNIVERSITÉ LAVAL

What type(s) of patients/clients have consulted you in the last month?

---

*Please check all that apply to you:*

Newborns  
 Babies  
 Children  
 Teenagers  
 Adults  
 Pregnant women  
 Seniors

>>

## Multimedia Appendix 2

### *Psychosocial Factors of Health Professionals' Intention to Use a Decision Aid for Down Syndrome Screening: Cross-Sectional Quantitative Study, A.Rahimi et al.*

FILTRE11 (FILTRE10=2-6)

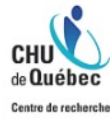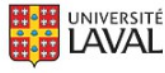

In the past two years, have you participated in a research project asking you to view this video (see the three representative images below)?

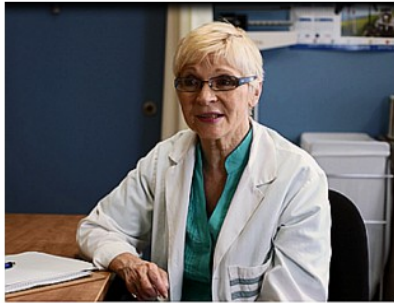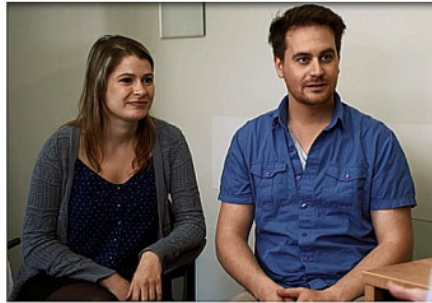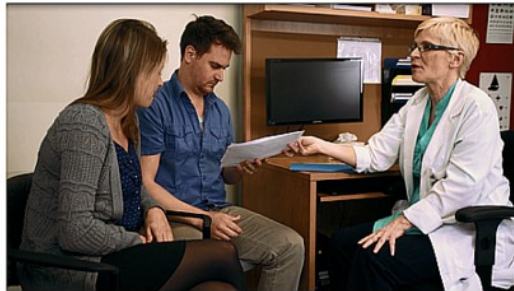

- I have seen this video
- I have never seen this video
- I am not sure if I have already seen this video

QGENDER (FILTRE11=2,3)

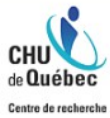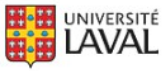

Are you...

- A man
- A woman

>>

## Multimedia Appendix 2

*Psychosocial Factors of Health Professionals' Intention to Use a Decision Aid for Down Syndrome Screening: Cross-Sectional Quantitative Study, A.Rahimi et al.*

**QREGION (ASK ALL)**



CHU de Québec Centre de recherche      UNIVERSITÉ LAVAL

Which region of Quebec do you live in?

---

- Bas-Saint-Laurent
- Saguenay-Lac-Saint-Jean
- Capitale-Nationale
- Mauricie
- Estrie
- Montréal
- Outaouais
- Abitibi-Témiscamingue
- Côte-Nord
- Nord-du-Québec
- Gaspésie/Îles-de-la-Madeleine
- Chaudière-Appalaches
- Laval
- Lanaudière
- Laurentides
- Montérégie
- Centre-du-Québec
- Other, please specify:
- I don't know

>>

**AGEYMD (Ask all)**



CHU de Québec Centre de recherche      UNIVERSITÉ LAVAL

What is your date of birth?

---

*Please indicate your Year of birth :*

>>

## Multimedia Appendix 2

### *Psychosocial Factors of Health Professionals' Intention to Use a Decision Aid for Down Syndrome Screening: Cross-Sectional Quantitative Study, A.Rahimi et al.*

**QETHNIE (ASK ALL)**



CHU de Québec  
Centre de recherche

UNIVERSITÉ LAVAL

What is your ethnic background?

---

*Please check all that apply to you*

- White/Caucasian
- Black/African/Afro-American, etc.
- Native/First Nations
- Latin American (Mexico, Chile, Costa Rica, etc.)
- Arab (Middle East, Maghreb, etc.)
- South Asian (India, Bangladesh, Pakistan, Sri Lanka, etc.)
- Southeast Asian (Vietnam, Cambodia, Malaysia, Laos, etc.)
- West Asian (Iran, Afghanistan, etc.)
- Chinese
- Filipino
- Korean
- Japanese
- Other, please specify:
- I would rather not answer

>>

**CEMAIL - ASK ALL**



CHU de Québec  
Centre de recherche

UNIVERSITÉ LAVAL

Good news! You are eligible to participate in this study. Thank you very much.

You will first be invited to watch a 10-minute video. You must watch the whole video and then complete the questionnaire (about 15 minutes).

To get the \$50 compensation, you must complete the full questionnaire. Subsequently we will ask you to provide some personal information, which will remain confidential, in order to mail your \$50 cheque. You can also refuse the \$50 compensation by checking the appropriate box at the end of the survey, so you will not have to give these information.

You must complete the full questionnaire as soon as possible because the link to this survey will be deactivated when the number of desired respondents is reached. If you want to complete the survey in more than one session, please provide a valid email address and we will send you a personal internet link to the survey.

*please enter your email address:*

Valid email address:

I want to complete the survey in a single session.

Please click on the following arrow to continue.

>>



## Multimedia Appendix 2

### *Psychosocial Factors of Health Professionals' Intention to Use a Decision Aid for Down Syndrome Screening: Cross-Sectional Quantitative Study, A.Rahimi et al.*

#### VID - ASK ALL

Health professionals who monitor pregnancies must inform pregnant women of available screening tests for Down syndrome (or trisomy 21). The use of a **Decision Aid** could increase the active involvement of pregnant women in making an informed and shared decision, which respects their values and preferences, regarding the choice of whether or not to have prenatal screening for Down syndrome.

Please watch this video that shows the optimal use of a **Decision Aid (four- page written document)** that intends to help the couple decide whether or not to have prenatal screening for Down syndrome while getting the support and advice of their family physician.

The goal of the following questionnaire is to **find out your opinion on the use of this Decision Aid if you had to use it in the future.**

Please click on " Play : ► " to start the video.

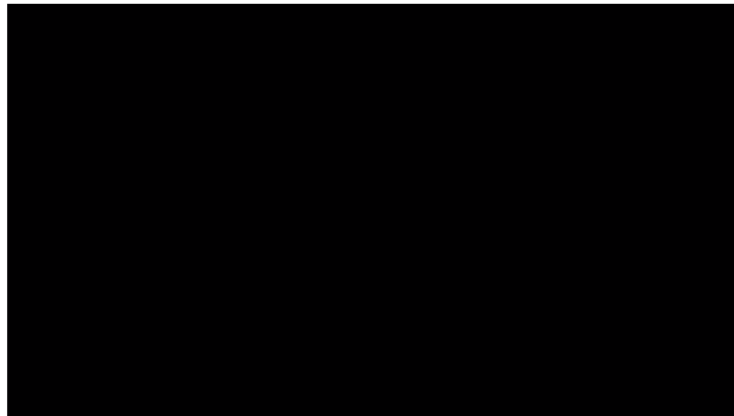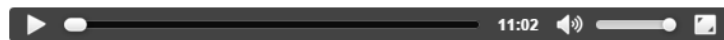

After watching the whole video, an arrow will appear below and you will be able to start the questionnaire.  
Please note that it is normal that you cannot select an option at the end of the video (deactivated function).

I cannot see this video (technical difficulties)

#### FILTRE12 (FILTRE11=3)

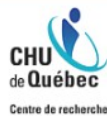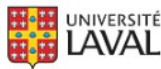

Because you were unsure, can you confirm whether or not you have already seen this video?

- I have seen this video before  
 I had not seen this video until today

>>

## Multimedia Appendix 2

### *Psychosocial Factors of Health Professionals' Intention to Use a Decision Aid for Down Syndrome Screening: Cross-Sectional Quantitative Study, A.Rahimi et al.*

#### INTRO (ASK ALL)

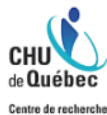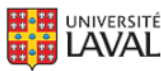

The video that you just watched showed the optimal use of a **Decision Aid (four-page written document)** that intends to help the couple decide whether or not to have prenatal screening for Down syndrome while getting the support and advice of their family physician.

The goal of the following questionnaire is **to find out your opinion on the use of this Decision Aid if you had to use it in the future.**

We are carrying out a similar project with pregnant women to find out their opinion. The objective is to introduce the routine use of a decision aid that is appropriate and helpful for all concerned.

**Please note:**

1. For each question, please **check the box** which best corresponds to your answer. There are no right or wrong answers. It is **your opinion** that interests us.
2. Certain statements may seem repetitive. This is due to the study's methodology. Please answer **all** questions.
3. It is important that you complete the whole questionnaire **yourself**, without any help.
4. By completing this survey, you give your **consent** to participate in this research project.
5. At the end of the questionnaire, we will ask you to answer a few socio-demographic questions.

**Your participation is much appreciated, thank you.**

Team of the Canada Research Chair in Implementation of Shared Decision Making in Primary Care. Dr. France Légaré, MD, PhD, clinician researcher and full professor, CHUQ Research Centre, Department of Family Medicine and Emergency Medicine, Faculty of Medicine, Université Laval, Quebec City, Quebec, Canada.

This project is funded by a research grant from Genome Canada and Genome Quebec and was approved by the ethical review boards of CHU de Québec, CSSS Vieille-Capitale and CSSS Alphonse-Desjardins.

To keep your responses confidential, the firm Leger will assign you a numerical code corresponding to your personal information to which they alone will have the key.

**Please click on the following arrow to continue.**

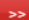

## Multimedia Appendix 2

### *Psychosocial Factors of Health Professionals' Intention to Use a Decision Aid for Down Syndrome Screening: Cross-Sectional Quantitative Study, A.Rahimi et al.*

**Q1 (ASK ALL)**



In the context of prenatal screening for Down syndrome, using a decision aid...

|                                                                | Very unlikely         | Somewhat unlikely     | Slightly unlikely     | Neither unlikely, nor likely | Slightly likely       | Somewhat likely       | Very likely           |
|----------------------------------------------------------------|-----------------------|-----------------------|-----------------------|------------------------------|-----------------------|-----------------------|-----------------------|
| ...would help pregnant women reflect upon the issue.           | <input type="radio"/> | <input type="radio"/> | <input type="radio"/> | <input type="radio"/>        | <input type="radio"/> | <input type="radio"/> | <input type="radio"/> |
| ...would enable the pregnant woman to express her preferences. | <input type="radio"/> | <input type="radio"/> | <input type="radio"/> | <input type="radio"/>        | <input type="radio"/> | <input type="radio"/> | <input type="radio"/> |
| ...would promote decision making.                              | <input type="radio"/> | <input type="radio"/> | <input type="radio"/> | <input type="radio"/>        | <input type="radio"/> | <input type="radio"/> | <input type="radio"/> |
| ...might require more time than planned for the consultation.  | <input type="radio"/> | <input type="radio"/> | <input type="radio"/> | <input type="radio"/>        | <input type="radio"/> | <input type="radio"/> | <input type="radio"/> |
| ...would be a source of relevant information.                  | <input type="radio"/> | <input type="radio"/> | <input type="radio"/> | <input type="radio"/>        | <input type="radio"/> | <input type="radio"/> | <input type="radio"/> |
| ...could make the pregnant woman anxious.                      | <input type="radio"/> | <input type="radio"/> | <input type="radio"/> | <input type="radio"/>        | <input type="radio"/> | <input type="radio"/> | <input type="radio"/> |

>>

**Q2 (ASK ALL)**



In the context of prenatal screening for Down syndrome, it would be easier for me to use a decision aid...

|                                                                                  | Strongly disagree     | Somewhat disagree     | Slightly disagree     | Neither disagree, nor agree | Slightly agree        | Somewhat agree        | Strongly agree        |
|----------------------------------------------------------------------------------|-----------------------|-----------------------|-----------------------|-----------------------------|-----------------------|-----------------------|-----------------------|
| ...if it was available in my consulting room.                                    | <input type="radio"/> | <input type="radio"/> | <input type="radio"/> | <input type="radio"/>       | <input type="radio"/> | <input type="radio"/> | <input type="radio"/> |
| ...if it was presented to the pregnant woman by a nurse before the consultation. | <input type="radio"/> | <input type="radio"/> | <input type="radio"/> | <input type="radio"/>       | <input type="radio"/> | <input type="radio"/> | <input type="radio"/> |
| ...if it was given to the pregnant woman before the consultation.                | <input type="radio"/> | <input type="radio"/> | <input type="radio"/> | <input type="radio"/>       | <input type="radio"/> | <input type="radio"/> | <input type="radio"/> |
| ...if I had prior training on how to use it.                                     | <input type="radio"/> | <input type="radio"/> | <input type="radio"/> | <input type="radio"/>       | <input type="radio"/> | <input type="radio"/> | <input type="radio"/> |

>>

## Multimedia Appendix 2

### *Psychosocial Factors of Health Professionals' Intention to Use a Decision Aid for Down Syndrome Screening: Cross-Sectional Quantitative Study, A.Rahimi et al.*

**Q3 (ASK ALL)**



CHU de Québec  
Centre de recherche

UNIVERSITÉ LAVAL

In the context of prenatal screening for Down syndrome, the following people would approve/disapprove of my using a decision aid:

|                                       | Would strongly disapprove | Would moderately disapprove | Would slightly disapprove | Would neither disapprove, nor approve | Would slightly approve | Would moderately approve | Would strongly approve |
|---------------------------------------|---------------------------|-----------------------------|---------------------------|---------------------------------------|------------------------|--------------------------|------------------------|
| my colleagues                         | <input type="radio"/>     | <input type="radio"/>       | <input type="radio"/>     | <input type="radio"/>                 | <input type="radio"/>  | <input type="radio"/>    | <input type="radio"/>  |
| my family                             | <input type="radio"/>     | <input type="radio"/>       | <input type="radio"/>     | <input type="radio"/>                 | <input type="radio"/>  | <input type="radio"/>    | <input type="radio"/>  |
| my patients/clients                   | <input type="radio"/>     | <input type="radio"/>       | <input type="radio"/>     | <input type="radio"/>                 | <input type="radio"/>  | <input type="radio"/>    | <input type="radio"/>  |
| public organization(s)                | <input type="radio"/>     | <input type="radio"/>       | <input type="radio"/>     | <input type="radio"/>                 | <input type="radio"/>  | <input type="radio"/>    | <input type="radio"/>  |
| a colleague with extensive experience | <input type="radio"/>     | <input type="radio"/>       | <input type="radio"/>     | <input type="radio"/>                 | <input type="radio"/>  | <input type="radio"/>    | <input type="radio"/>  |

**>>**

**Q4 (ASK ALL)**



CHU de Québec  
Centre de recherche

UNIVERSITÉ LAVAL

In the context of prenatal screening for Down syndrome, in your view, what percentage of your colleagues would use a decision aid?

| None<br>0%            | A quarter<br>25%      | Half<br>50%           | Three quarters<br>75% | All<br>100%           |
|-----------------------|-----------------------|-----------------------|-----------------------|-----------------------|
| <input type="radio"/> | <input type="radio"/> | <input type="radio"/> | <input type="radio"/> | <input type="radio"/> |

**>>**

## Multimedia Appendix 2

### *Psychosocial Factors of Health Professionals' Intention to Use a Decision Aid for Down Syndrome Screening: Cross-Sectional Quantitative Study, A.Rahimi et al.*

**Q5 (ASK ALL)**



CHU de Québec  
Centre de recherche

UNIVERSITÉ LAVAL

In the context of prenatal screening for Down syndrome, ...

|                                                                                                | Very unlikely         | Somewhat unlikely     | Slightly unlikely     | Neither unlikely, nor likely | Slightly likely       | Somewhat likely       | Very likely           |
|------------------------------------------------------------------------------------------------|-----------------------|-----------------------|-----------------------|------------------------------|-----------------------|-----------------------|-----------------------|
| ...I would regret NOT having used a decision aid.                                              | <input type="radio"/> | <input type="radio"/> | <input type="radio"/> | <input type="radio"/>        | <input type="radio"/> | <input type="radio"/> | <input type="radio"/> |
| ...my patients/clients' uncertainty would encourage me to use a decision aid.                  | <input type="radio"/> | <input type="radio"/> | <input type="radio"/> | <input type="radio"/>        | <input type="radio"/> | <input type="radio"/> | <input type="radio"/> |
| ...I believe that most of my colleagues would use a decision aid.                              | <input type="radio"/> | <input type="radio"/> | <input type="radio"/> | <input type="radio"/>        | <input type="radio"/> | <input type="radio"/> | <input type="radio"/> |
| ...the need to make a decision with my patient/client would motivate me to use a decision aid. | <input type="radio"/> | <input type="radio"/> | <input type="radio"/> | <input type="radio"/>        | <input type="radio"/> | <input type="radio"/> | <input type="radio"/> |
| ...I would be fine with NOT using a decision aid.                                              | <input type="radio"/> | <input type="radio"/> | <input type="radio"/> | <input type="radio"/>        | <input type="radio"/> | <input type="radio"/> | <input type="radio"/> |
| ...if I wanted to, I could easily use a decision aid.                                          | <input type="radio"/> | <input type="radio"/> | <input type="radio"/> | <input type="radio"/>        | <input type="radio"/> | <input type="radio"/> | <input type="radio"/> |

[>>](#)

## Multimedia Appendix 2

### *Psychosocial Factors of Health Professionals' Intention to Use a Decision Aid for Down Syndrome Screening: Cross-Sectional Quantitative Study, A.Rahimi et al.*



CHU de Québec  
Centre de recherche

UNIVERSITÉ L'AVALE

In the context of prenatal screening for Down syndrome, using a decision aid would be...

---

|                       |                       |                       |                             |                       |                       |                       |
|-----------------------|-----------------------|-----------------------|-----------------------------|-----------------------|-----------------------|-----------------------|
| Very difficult        | Somewhat difficult    | Slightly difficult    | Neither difficult, nor easy | Slightly easy         | Somewhat easy         | Very easy             |
| <input type="radio"/> | <input type="radio"/> | <input type="radio"/> | <input type="radio"/>       | <input type="radio"/> | <input type="radio"/> | <input type="radio"/> |

  

|                       |                       |                       |                                     |                       |                       |                       |
|-----------------------|-----------------------|-----------------------|-------------------------------------|-----------------------|-----------------------|-----------------------|
| Very detrimental      | Somewhat detrimental  | Slightly detrimental  | Neither detrimental, nor beneficial | Slightly beneficial   | Somewhat beneficial   | Very beneficial       |
| <input type="radio"/> | <input type="radio"/> | <input type="radio"/> | <input type="radio"/>               | <input type="radio"/> | <input type="radio"/> | <input type="radio"/> |

  

|                       |                       |                       |                                     |                       |                       |                       |
|-----------------------|-----------------------|-----------------------|-------------------------------------|-----------------------|-----------------------|-----------------------|
| Very deprecating      | Somewhat deprecating  | Slightly deprecating  | Neither deprecating, nor gratifying | Slightly gratifying   | Somewhat gratifying   | Very gratifying       |
| <input type="radio"/> | <input type="radio"/> | <input type="radio"/> | <input type="radio"/>               | <input type="radio"/> | <input type="radio"/> | <input type="radio"/> |

  

|                       |                       |                       |                                 |                       |                       |                       |
|-----------------------|-----------------------|-----------------------|---------------------------------|-----------------------|-----------------------|-----------------------|
| Very optional         | Somewhat optional     | Slightly optional     | Neither optional, nor essential | Slightly essential    | Somewhat essential    | Very essential        |
| <input type="radio"/> | <input type="radio"/> | <input type="radio"/> | <input type="radio"/>           | <input type="radio"/> | <input type="radio"/> | <input type="radio"/> |

  

|                       |                       |                       |                             |                       |                       |                       |
|-----------------------|-----------------------|-----------------------|-----------------------------|-----------------------|-----------------------|-----------------------|
| Very useless          | Somewhat useless      | Slightly useless      | Neither useless, nor useful | Slightly useful       | Somewhat useful       | Very useful           |
| <input type="radio"/> | <input type="radio"/> | <input type="radio"/> | <input type="radio"/>       | <input type="radio"/> | <input type="radio"/> | <input type="radio"/> |

  

|                       |                       |                       |                                  |                       |                       |                       |
|-----------------------|-----------------------|-----------------------|----------------------------------|-----------------------|-----------------------|-----------------------|
| Very unpleasant       | Somewhat unpleasant   | Slightly unpleasant   | Neither unpleasant, nor pleasant | Slightly pleasant     | Somewhat pleasant     | Very pleasant         |
| <input type="radio"/> | <input type="radio"/> | <input type="radio"/> | <input type="radio"/>            | <input type="radio"/> | <input type="radio"/> | <input type="radio"/> |

>>

## Multimedia Appendix 2

### *Psychosocial Factors of Health Professionals' Intention to Use a Decision Aid for Down Syndrome Screening: Cross-Sectional Quantitative Study, A.Rahimi et al.*

**Q7 (ASK ALL)**



In the context of prenatal screening for Down syndrome, ...

|                                                                                          | Strongly disagree     | Somewhat disagree     | Slightly disagree     | Neither disagree, nor agree | Slightly agree        | Somewhat agree        | Strongly agree        |
|------------------------------------------------------------------------------------------|-----------------------|-----------------------|-----------------------|-----------------------------|-----------------------|-----------------------|-----------------------|
| ... using a decision aid would depend only on me                                         | <input type="radio"/> | <input type="radio"/> | <input type="radio"/> | <input type="radio"/>       | <input type="radio"/> | <input type="radio"/> | <input type="radio"/> |
| ...most people who are important to me would recommend that I use a decision aid.        | <input type="radio"/> | <input type="radio"/> | <input type="radio"/> | <input type="radio"/>       | <input type="radio"/> | <input type="radio"/> | <input type="radio"/> |
| ... I would feel that I am able to use a decision aid.                                   | <input type="radio"/> | <input type="radio"/> | <input type="radio"/> | <input type="radio"/>       | <input type="radio"/> | <input type="radio"/> | <input type="radio"/> |
| ...the people who are most important to me would think that I should use a decision aid. | <input type="radio"/> | <input type="radio"/> | <input type="radio"/> | <input type="radio"/>       | <input type="radio"/> | <input type="radio"/> | <input type="radio"/> |
| ... I believe that many of my colleagues would use a decision aid.                       | <input type="radio"/> | <input type="radio"/> | <input type="radio"/> | <input type="radio"/>       | <input type="radio"/> | <input type="radio"/> | <input type="radio"/> |
| ... It would be up to me to use a decision aid.                                          | <input type="radio"/> | <input type="radio"/> | <input type="radio"/> | <input type="radio"/>       | <input type="radio"/> | <input type="radio"/> | <input type="radio"/> |

>>

**Q8 (ASK ALL)**



In the context of prenatal screening for Down syndrome, ...:

... If I used a decision aid, most of the people who are important to me...

| Would strongly disapprove | Would moderately disapprove | Would slightly disapprove | Would neither disapprove, nor approve | Would slightly approve | Would moderately approve | Would strongly approve |
|---------------------------|-----------------------------|---------------------------|---------------------------------------|------------------------|--------------------------|------------------------|
| <input type="radio"/>     | <input type="radio"/>       | <input type="radio"/>     | <input type="radio"/>                 | <input type="radio"/>  | <input type="radio"/>    | <input type="radio"/>  |

... to what extent do you feel that you have control over the decision to use a decision aid?

| Very uncontrollable   | Somewhat uncontrollable | Slightly uncontrollable | Neither uncontrollable, nor controllable | Slightly controllable | Somewhat controllable | Very controllable     |
|-----------------------|-------------------------|-------------------------|------------------------------------------|-----------------------|-----------------------|-----------------------|
| <input type="radio"/> | <input type="radio"/>   | <input type="radio"/>   | <input type="radio"/>                    | <input type="radio"/> | <input type="radio"/> | <input type="radio"/> |

>>

## Multimedia Appendix 2

### *Psychosocial Factors of Health Professionals' Intention to Use a Decision Aid for Down Syndrome Screening: Cross-Sectional Quantitative Study, A.Rahimi et al.*

**Q8 (ASK ALL)**



CHU de Québec  
Centre de recherche

UNIVERSITÉ LAVAL

In the context of prenatal screening for Down syndrome, as a health professional, ...

|                                                                                       | Strongly disagree     | Somewhat disagree     | Slightly disagree     | Neither disagree, nor agree | Slightly agree        | Somewhat agree        | Strongly agree        |
|---------------------------------------------------------------------------------------|-----------------------|-----------------------|-----------------------|-----------------------------|-----------------------|-----------------------|-----------------------|
| ... I consider that it would be appropriate for me to use a decision aid.             | <input type="radio"/> | <input type="radio"/> | <input type="radio"/> | <input type="radio"/>       | <input type="radio"/> | <input type="radio"/> | <input type="radio"/> |
| ... I consider it to be my role to use a decision aid.                                | <input type="radio"/> | <input type="radio"/> | <input type="radio"/> | <input type="radio"/>       | <input type="radio"/> | <input type="radio"/> | <input type="radio"/> |
| ... I consider that it would be necessary for me to use a decision aid.               | <input type="radio"/> | <input type="radio"/> | <input type="radio"/> | <input type="radio"/>       | <input type="radio"/> | <input type="radio"/> | <input type="radio"/> |
| ... I consider that it is my duty to present the decision aid to my patients/clients. | <input type="radio"/> | <input type="radio"/> | <input type="radio"/> | <input type="radio"/>       | <input type="radio"/> | <input type="radio"/> | <input type="radio"/> |

[>>](#)



## Multimedia Appendix 2

### *Psychosocial Factors of Health Professionals' Intention to Use a Decision Aid for Down Syndrome Screening: Cross-Sectional Quantitative Study, A.Rahimi et al.*

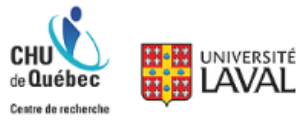

In the context of prenatal screening for Down syndrome ...

... I plan to use a decision aid.

| Very unlikely         | Somewhat unlikely     | Slightly unlikely     | Neither unlikely,<br>nor likely | Slightly likely       | Somewhat likely       | Very likely           |
|-----------------------|-----------------------|-----------------------|---------------------------------|-----------------------|-----------------------|-----------------------|
| <input type="radio"/> | <input type="radio"/> | <input type="radio"/> | <input type="radio"/>           | <input type="radio"/> | <input type="radio"/> | <input type="radio"/> |

... using a decision aid would be in keeping with my moral values.

| Strongly disagree     | Somewhat disagree     | Slightly disagree     | Neither disagree,<br>nor agree | Slightly agree        | Somewhat agree        | Strongly agree        |
|-----------------------|-----------------------|-----------------------|--------------------------------|-----------------------|-----------------------|-----------------------|
| <input type="radio"/> | <input type="radio"/> | <input type="radio"/> | <input type="radio"/>          | <input type="radio"/> | <input type="radio"/> | <input type="radio"/> |

... even if it was difficult, I would be able to use a decision aid.

| Very unlikely         | Somewhat unlikely     | Slightly unlikely     | Neither unlikely,<br>nor likely | Slightly likely       | Somewhat likely       | Very likely           |
|-----------------------|-----------------------|-----------------------|---------------------------------|-----------------------|-----------------------|-----------------------|
| <input type="radio"/> | <input type="radio"/> | <input type="radio"/> | <input type="radio"/>           | <input type="radio"/> | <input type="radio"/> | <input type="radio"/> |

... using a decision aid would be in keeping with my principles.

| Strongly disagree     | Somewhat disagree     | Slightly disagree     | Neither disagree,<br>nor agree | Slightly agree        | Somewhat agree        | Strongly agree        |
|-----------------------|-----------------------|-----------------------|--------------------------------|-----------------------|-----------------------|-----------------------|
| <input type="radio"/> | <input type="radio"/> | <input type="radio"/> | <input type="radio"/>          | <input type="radio"/> | <input type="radio"/> | <input type="radio"/> |

>>

Multimedia Appendix 2

Psychosocial Factors of Health Professionals' Intention to Use a Decision Aid for Down Syndrome Screening: Cross-Sectional Quantitative Study, A.Rahimi et al.

**Q9E (ASK ALL)**



CHU de Québec Centre de recherche      UNIVERSITÉ LAVAL

In the context of prenatal screening for Down syndrome ...

|                                     | Very unlikely         | Somewhat unlikely     | Slightly unlikely     | Neither unlikely, nor likely | Slightly likely       | Somewhat likely       | Very likely           |
|-------------------------------------|-----------------------|-----------------------|-----------------------|------------------------------|-----------------------|-----------------------|-----------------------|
| ... I intend to use a decision aid. | <input type="radio"/> | <input type="radio"/> | <input type="radio"/> | <input type="radio"/>        | <input type="radio"/> | <input type="radio"/> | <input type="radio"/> |

  

|                                                                                                      | Strongly disagree     | Somewhat disagree     | Slightly disagree     | Neither disagree, nor agree | Slightly agree        | Somewhat agree        | Strongly agree        |
|------------------------------------------------------------------------------------------------------|-----------------------|-----------------------|-----------------------|-----------------------------|-----------------------|-----------------------|-----------------------|
| ...my personal values would lead me to use a decision aid.                                           | <input type="radio"/> | <input type="radio"/> | <input type="radio"/> | <input type="radio"/>       | <input type="radio"/> | <input type="radio"/> | <input type="radio"/> |
| ...using a decision aid would be ethically acceptable for me.                                        | <input type="radio"/> | <input type="radio"/> | <input type="radio"/> | <input type="radio"/>       | <input type="radio"/> | <input type="radio"/> | <input type="radio"/> |
| ... I believe that most of my colleagues would consider that using a decision aid is a good practice | <input type="radio"/> | <input type="radio"/> | <input type="radio"/> | <input type="radio"/>       | <input type="radio"/> | <input type="radio"/> | <input type="radio"/> |

  

|                                                   | Very low              | Somewhat low          | Slightly low          | Neither low, nor strong | Slightly strong       | Somewhat strong       | Very strong           |
|---------------------------------------------------|-----------------------|-----------------------|-----------------------|-------------------------|-----------------------|-----------------------|-----------------------|
| ... the likelihood of my using a decision aid is: | <input type="radio"/> | <input type="radio"/> | <input type="radio"/> | <input type="radio"/>   | <input type="radio"/> | <input type="radio"/> | <input type="radio"/> |

**>>**

**Q10 (ASK ALL)**



CHU de Québec Centre de recherche      UNIVERSITÉ LAVAL

In the context of prenatal screening for Down syndrome, I would feel capable of using a decision aid...

|                                                     | Strongly disagree     | Somewhat disagree     | Slightly disagree     | Neither disagree, nor agree | Slightly agree        | Somewhat agree        | Strongly agree        |
|-----------------------------------------------------|-----------------------|-----------------------|-----------------------|-----------------------------|-----------------------|-----------------------|-----------------------|
| ...even if I do NOT have easy access to it.         | <input type="radio"/> | <input type="radio"/> | <input type="radio"/> | <input type="radio"/>       | <input type="radio"/> | <input type="radio"/> | <input type="radio"/> |
| ...even if it is only available in paper format.    | <input type="radio"/> | <input type="radio"/> | <input type="radio"/> | <input type="radio"/>       | <input type="radio"/> | <input type="radio"/> | <input type="radio"/> |
| ...even if this prolonged the consultation process. | <input type="radio"/> | <input type="radio"/> | <input type="radio"/> | <input type="radio"/>       | <input type="radio"/> | <input type="radio"/> | <input type="radio"/> |

**>>**

## Multimedia Appendix 2

### *Psychosocial Factors of Health Professionals' Intention to Use a Decision Aid for Down Syndrome Screening: Cross-Sectional Quantitative Study, A.Rahimi et al.*

**Q11 (ASK ALL)**



CHU de Québec  
Centre de recherche

UNIVERSITÉ LAVAL

In the context of prenatal screening for Down syndrome, ...

|                                                     | Very unlikely         | Somewhat unlikely     | Slightly unlikely     | Neither unlikely, nor likely | Slightly likely       | Somewhat likely       | Very likely           |
|-----------------------------------------------------|-----------------------|-----------------------|-----------------------|------------------------------|-----------------------|-----------------------|-----------------------|
| ...using a decision aid would give me satisfaction. | <input type="radio"/> | <input type="radio"/> | <input type="radio"/> | <input type="radio"/>        | <input type="radio"/> | <input type="radio"/> | <input type="radio"/> |
| ... I would feel comfortable using a decision aid.  | <input type="radio"/> | <input type="radio"/> | <input type="radio"/> | <input type="radio"/>        | <input type="radio"/> | <input type="radio"/> | <input type="radio"/> |
| ...using a decision aid would reassure me.          | <input type="radio"/> | <input type="radio"/> | <input type="radio"/> | <input type="radio"/>        | <input type="radio"/> | <input type="radio"/> | <input type="radio"/> |
| ...using a decision aid would give me confidence.   | <input type="radio"/> | <input type="radio"/> | <input type="radio"/> | <input type="radio"/>        | <input type="radio"/> | <input type="radio"/> | <input type="radio"/> |

[>>](#)

**Q12 (ASK ALL)**



CHU de Québec  
Centre de recherche

UNIVERSITÉ LAVAL

In the context of prenatal screening for Down syndrome, I would use a decision aid if it respected the following elements:

|                                                                                                                                                 | Strongly disagree     | Somewhat disagree     | Slightly disagree     | Neither disagree, nor agree | Slightly agree        | Somewhat agree        | Strongly agree        |
|-------------------------------------------------------------------------------------------------------------------------------------------------|-----------------------|-----------------------|-----------------------|-----------------------------|-----------------------|-----------------------|-----------------------|
| It must include information on prenatal tests offered in the private sector.                                                                    | <input type="radio"/> | <input type="radio"/> | <input type="radio"/> | <input type="radio"/>       | <input type="radio"/> | <input type="radio"/> | <input type="radio"/> |
| It must not be biased in favor of one decision over the other.                                                                                  | <input type="radio"/> | <input type="radio"/> | <input type="radio"/> | <input type="radio"/>       | <input type="radio"/> | <input type="radio"/> | <input type="radio"/> |
| It must respect the cultural, religious and ethnic values of my patients/clients.                                                               | <input type="radio"/> | <input type="radio"/> | <input type="radio"/> | <input type="radio"/>       | <input type="radio"/> | <input type="radio"/> | <input type="radio"/> |
| It must include information about the Non-Invasive Prenatal Test (NIPT) that analyzes the DNA of the foetus in the blood of the pregnant woman. | <input type="radio"/> | <input type="radio"/> | <input type="radio"/> | <input type="radio"/>       | <input type="radio"/> | <input type="radio"/> | <input type="radio"/> |
| It must be properly used during a single pregnancy follow-up appointment.                                                                       | <input type="radio"/> | <input type="radio"/> | <input type="radio"/> | <input type="radio"/>       | <input type="radio"/> | <input type="radio"/> | <input type="radio"/> |

[>>](#)

## Multimedia Appendix 2

*Psychosocial Factors of Health Professionals' Intention to Use a Decision Aid for Down Syndrome Screening: Cross-Sectional Quantitative Study, A.Rahimi et al.*

**Q13 (ASK ALL)**



CHU de Québec Centre de recherche      UNIVERSITÉ LAVAL

In the context of prenatal screening for Down syndrome, ...

---

|                                    | Yes                   | No                    |
|------------------------------------|-----------------------|-----------------------|
| ... I already knew a decision aid. | <input type="radio"/> | <input type="radio"/> |
| ... I know the government tool.    | <input type="radio"/> | <input type="radio"/> |

I know a decision aid regarding another issue:

---

| Yes                   | No                    |
|-----------------------|-----------------------|
| <input type="radio"/> | <input type="radio"/> |

>>

**QD1 (Ask all)**



CHU de Québec Centre de recherche      UNIVERSITÉ LAVAL

When did you obtain your license to practice OR if you are student, when will you obtain it?

---

| Month                       | year                        |
|-----------------------------|-----------------------------|
| Please select your answer ▼ | Please select your answer ▼ |

>>

## Multimedia Appendix 2

*Psychosocial Factors of Health Professionals' Intention to Use a Decision Aid for Down Syndrome Screening: Cross-Sectional Quantitative Study, A.Rahimi et al.*

**QD4 (ASK ALL)**



CHU de Québec Centre de recherche  
UNIVERSITÉ LAVAL

Estimate the average number of patients/clients you see per week, not counting those you see when you are on call.

---

Patients-clients/week:

>>

**QD5 (ASK ALL)**



CHU de Québec Centre de recherche  
UNIVERSITÉ LAVAL

Estimate how many prenatal visits do you do per month?

---

Prenatal visits/month :

>>

**QD9 (ASK ALL)**



CHU de Québec Centre de recherche  
UNIVERSITÉ LAVAL

What is your mother tongue?

---

French  
 English  
 Other (specify):

>>

## Multimedia Appendix 2

### *Psychosocial Factors of Health Professionals' Intention to Use a Decision Aid for Down Syndrome Screening: Cross-Sectional Quantitative Study, A.Rahimi et al.*

**QADRO**



CHU de Québec  
Centre de recherche

UNIVERSITÉ LAVAL

Thank you for your participation. Please provide your contact information in order to mail your \$50 cheque. You will receive it in the coming weeks. Be assured that your personal information will be kept strictly confidential.

---

I refuse the \$50 compensation.  
 I want to get the \$50 compensation

First name   
Last name   
Address Line 1   
Address Line 2   
City   
Province   
Postal Code:   
Permit number (please write 999 if ongoing)

[>>](#)

**MessComplete**



CHU de Québec  
Centre de recherche

UNIVERSITÉ LAVAL

Your participation is much appreciated, thank you. If you have any questions or comments, please contact Johannie Lépine (PhD), post-doctoral fellow in public health.

**Email:** [Johannie.Lepine.1@ulaval.ca](mailto:Johannie.Lepine.1@ulaval.ca)

**Phone:** 418-525-4444 (Ext. 53701)

[>>](#)

## Multimedia Appendix 2

### *Psychosocial Factors of Health Professionals' Intention to Use a Decision Aid for Down Syndrome Screening: Cross-Sectional Quantitative Study, A.Rahimi et al.*

Canada research chair  
in implementation of shared decision making in primary care

Contact us | Site map | KT Canada | Faculté de médecine | Disclaimer | Français

Home page | The Chair | Research team | Research | PBRN | List of SDM programs | Decision aids | Tool box | Training | Useful links | Career

Home page » Research » Projects » PEGASUS

#### Projects

- PEGASUS
- Continuing Prof. Dev.
- Cochrane systematic reviews
- Decision+
- Interprofessional approaches
- International collaboration
- Professional development
- Exackte 2
- Genetics
- UETMIS
- KT-Canada

### PEGASUS: PERSONALIZED GENOMICS FOR PRENATAL ANEUPLOIDY SCREENING USING MATERNAL BLOOD

Each year, 450,000 Canadian women become pregnant and, as a result of their participation in prenatal screening for Down syndrome, approximately 10,000 of them will have an amniocentesis (i.e. sampling of liquid surrounding the fetus) and of those, 315 will be found to carry a baby with Down syndrome and 70 normal pregnancies will be lost from complications of the procedure.

It has been discovered recently that, during pregnancy, there is fetal DNA in maternal blood in sufficient quantities to be analyzed and methods have been proposed to detect the presence of a fetus with Down syndrome using maternal blood. The introduction of genomic blood testing as proposed in the context of this project could lead to increased detection of Down syndrome, less invasive screening with 9,700 amniocenteses avoided each year in Canada, improving the peace of mind of pregnant women, and preventing the accidental loss of 70 normal fetuses, at a lower overall cost than current practice.

However, these methods still need to be validated before being appropriately introduced in routine care. This project proposes to carry out an independent study that will validate the performance and utility of these new genomic technologies for screening in pregnant women using maternal blood. The team of researchers will identify an evidence-based cost-effective approach for implementation of this new technology in the Canadian health care system. They will develop decision-making tools that will assist couples in making informed decisions, as well as educational tools for health care professionals, all integral components of the implementation of genomics-based non-invasive prenatal diagnosis.

The deliverables of this project will enable decision makers—pregnant women and their partner—to make informed choices pertaining to prenatal genetic screening and diagnosis, such as screening for Down syndrome, and to reduce the risk to pregnancies associated with amniocentesis.

[Official website](#)

Print | Send to a friend | [Disclaimer](#)

Last site update 2016-01-15  
Last page update 2015-01-08

<http://www.decision.chaire.fmed.ulaval.ca/en/research/projects/pegasus/>
